# Supplementary material
Source: publisher figshare collection journal article supplement (https://sage.figshare.com/ndownloader/files/26578332)
Supplement: Supplementary file 1 [file 26578332]

Archive with 2 entries (2 files):
- KUNZE_COI_TELEHEALTH.pdf
- NWACHUKWU_COI_TELEHEALTH.pdf
